# Supplementary material for: Pre-hospital One-Hour Troponin in a Low-Prevalence Population of Acute Coronary Syndrome: OUT-ACS study
Source: PubMed Central journal article supplement — Open Heart. 2020 Jul 22;7(2):e001296. doi: 10.1136/openhrt-2020-001296 (PMC7380862; doi:10.1136/openhrt-2020-001296), 2020-07-22
Supplement: openhrt-2020-001296supp001.pdf [file openhrt-2020-001296supp001.pdf]

## ONLINE SUPPLEMENTARY APPENDIX

Supplementary material to the paper:

**Pre-hospital One-hoUr Troponin in a low-prevalence population of  
Acute Coronary Syndrome**

The OUT-ACS study

By Tonje R. Johannessen, Odd Martin Vallersnes,  
Sigrun Halvorsen, Anne Cecilie K. Larstorp, Ibrahimu Mdala and Dan Atar

Johannessen TR, *et al.* *Open Heart* 2020;**0**:e001296. doi:10.1136/openhrt-2020-001296

**Figure S1 Patient management at Oslo Accident and Emergency Outpatient Clinic prior study enrollment**

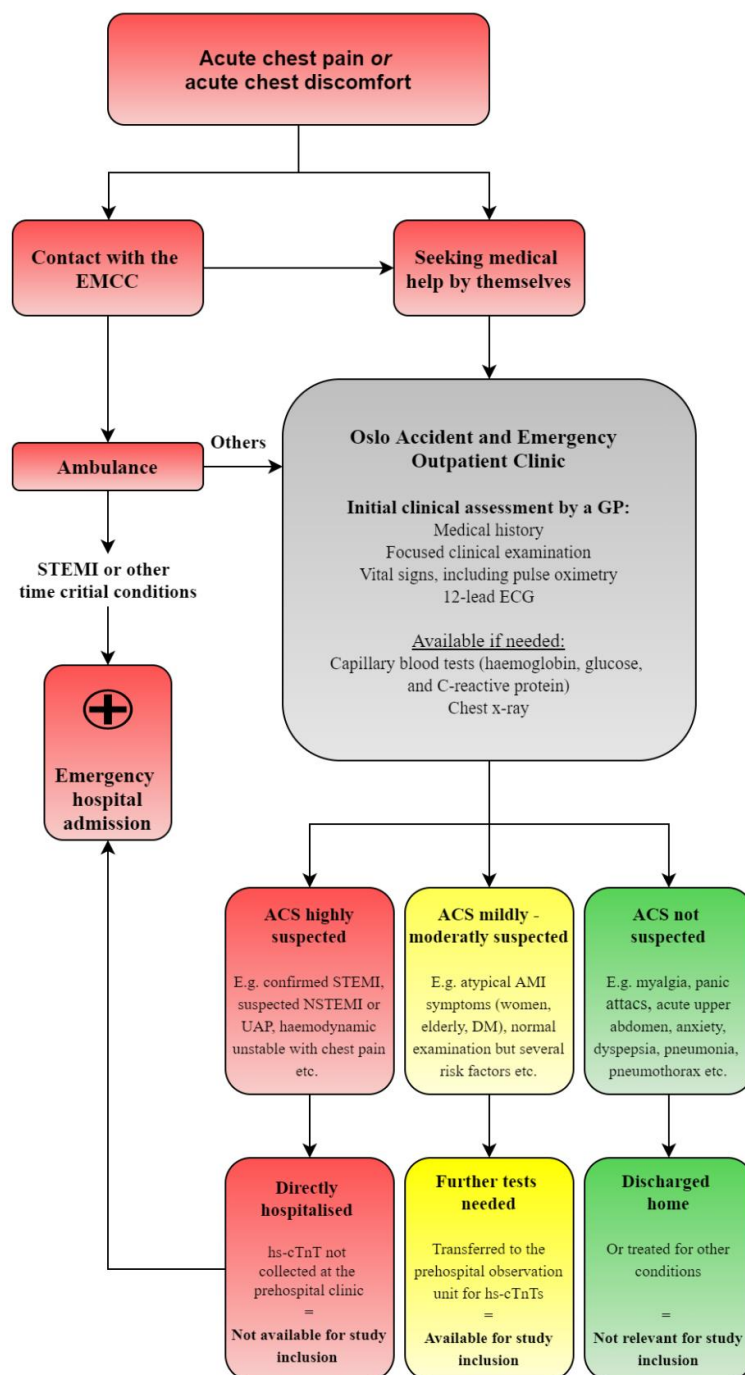

ACS: acute coronary syndrome; AMI: acute myocardial infarction; DM: diabetes mellitus; ECG: electrocardiogram; EMCC: emergency medical communication centre; GP: general practitioner; hs-cTnT: high-sensitivity cardiac troponin T, NSTEMI; non-ST-segment Elevation Myocardial Infarction; STEMI; ST-Elevation Myocardial Infarction, UAP: unstable angina pectoris

## Sample size

We estimated the minimum sample size required based on a presumed AMI prevalence of 5 % in a general practice chest pain population (1-3). A power of 80 %, with a critical level of significance of 5 % resulted in an initial minimum sample size of 1039 patients. However, hs-cTnT was sampled at three different time points (0h, 1h and 4h) for each patient. Due to this clustering effect of the data at the patient level, the initial sample size was inflated using a design effect of 1.6 to give a minimum sample size of 1662 patients.

**Table S1 STARD checklist for studies on diagnostic accuracy (4)**

| Section & Topic          | No  | Item                                                                                                                                                   | Reported on page # |
|--------------------------|-----|--------------------------------------------------------------------------------------------------------------------------------------------------------|--------------------|
| <b>TITLE OR ABSTRACT</b> | 1   | Identification as a study of diagnostic accuracy using at least one measure of accuracy (such as sensitivity, specificity, predictive values, or AUC)  | 2                  |
| <b>ABSTRACT</b>          | 2   | Structured summary of study design, methods, results, and conclusions (for specific guidance, see STARD for Abstracts)                                 | 2                  |
| <b>INTRODUCTION</b>      | 3   | Scientific and clinical background, including the intended use and clinical role of the index test                                                     | 4                  |
|                          | 4   | Study objectives and hypotheses                                                                                                                        | 4                  |
| <b>METHODS</b>           |     |                                                                                                                                                        |                    |
| <i>Study design</i>      | 5   | Whether data collection was planned before the index test and reference standard were performed (prospective study) or after (retrospective study)     | 5                  |
| <i>Participants</i>      | 6   | Eligibility criteria                                                                                                                                   | 5                  |
|                          | 7   | On what basis potentially eligible participants were identified (such as symptoms, results from previous tests, inclusion in registry)                 | 5, Figure S1       |
|                          | 8   | Where and when potentially eligible participants were identified (setting, location and dates)                                                         | 5, Figure S1       |
|                          | 9   | Whether participants formed a consecutive, random or convenience series                                                                                | 5                  |
| <i>Test methods</i>      | 10a | Index test, in sufficient detail to allow replication                                                                                                  | 6-7                |
|                          | 10b | Reference standard, in sufficient detail to allow replication                                                                                          | 7                  |
|                          | 11  | Rationale for choosing the reference standard (if alternatives exist)                                                                                  | 7                  |
|                          | 12a | Definition of and rationale for test positivity cut-offs or result categories of the index test, distinguishing pre-specified from exploratory         | 7, Figure 2        |
|                          | 12b | Definition of and rationale for test positivity cut-offs or result categories of the reference standard, distinguishing pre-specified from exploratory | 8                  |
|                          | 13a | Whether clinical information and reference standard results were available to the performers/readers of the index test                                 | 8                  |
|                          | 13b | Whether clinical information and index test results were available to the assessors of the reference standard                                          | 8                  |
| <i>Analysis</i>          | 14  | Methods for estimating or comparing measures of diagnostic accuracy                                                                                    | 8-9                |

|                          |     |                                                                                                             |                        |
|--------------------------|-----|-------------------------------------------------------------------------------------------------------------|------------------------|
|                          | 15  | How indeterminate index test or reference standard results were handled                                     | Table 2, 15            |
|                          | 16  | How missing data on the index test and reference standard were handled                                      | 9                      |
|                          | 17  | Any analyses of variability in diagnostic accuracy, distinguishing pre-specified from exploratory           | n.a.                   |
|                          | 18  | Intended sample size and how it was determined                                                              | Supplementary appendix |
| <b>RESULTS</b>           |     |                                                                                                             |                        |
| <i>Participants</i>      | 19  | Flow of participants, using a diagram                                                                       | 10, Figure 1           |
|                          | 20  | Baseline demographic and clinical characteristics of participants                                           | 11, Table 1            |
|                          | 21a | Distribution of severity of disease in those with the target condition                                      | 12, Table S2           |
|                          | 21b | Distribution of alternative diagnoses in those without the target condition                                 | 12, Table S3           |
|                          | 22  | Time interval and any clinical interventions between index test and reference standard                      | 7                      |
| <i>Test results</i>      | 23  | Cross tabulation of the index test results (or their distribution) by the results of the reference standard | 13, Figure 2           |
|                          | 24  | Estimates of diagnostic accuracy and their precision (such as 95% confidence intervals)                     | Figure 2-3             |
|                          | 25  | Any adverse events from performing the index test or the reference standard                                 | 13, Table 2            |
| <b>DISCUSSION</b>        |     |                                                                                                             |                        |
|                          | 26  | Study limitations, including sources of potential bias, statistical uncertainty, and generalisability       | 16                     |
|                          | 27  | Implications for practice, including the intended use and clinical role of the index test                   | 16, and 18             |
| <b>OTHER INFORMATION</b> |     |                                                                                                             |                        |
|                          | 28  | Registration number and name of registry                                                                    | 2, and 10              |
|                          | 29  | Where the full study protocol can be accessed                                                               | n.a.                   |
|                          | 30  | Sources of funding and other support; role of funders                                                       | 19                     |
| n.a.: not available      |     |                                                                                                             |                        |

| <b>Table S2 Hs-cTnT in patients with acute myocardial infarction</b>                                                                                                                                                                                                                                                                                                      |                             |                            |                               |                                    |                                 |
|---------------------------------------------------------------------------------------------------------------------------------------------------------------------------------------------------------------------------------------------------------------------------------------------------------------------------------------------------------------------------|-----------------------------|----------------------------|-------------------------------|------------------------------------|---------------------------------|
|                                                                                                                                                                                                                                                                                                                                                                           | <b>Total AMI<br/>(n=61)</b> | <b>Rule-out<br/>(n=1)*</b> | <b>Observation<br/>(n=15)</b> | <b>Rule-in<br/>(n=45)</b>          |                                 |
| <b>Manifestation at the OAEOC, n</b>                                                                                                                                                                                                                                                                                                                                      |                             |                            |                               |                                    |                                 |
| 0h ≥52 ng/L                                                                                                                                                                                                                                                                                                                                                               | 34                          | -                          | -                             | 34                                 |                                 |
| Δ0-1 hour                                                                                                                                                                                                                                                                                                                                                                 | 11                          | -                          | -                             | 11                                 |                                 |
| Δ0-4 hour                                                                                                                                                                                                                                                                                                                                                                 | 8                           | 1                          | 7                             | -                                  |                                 |
| Altered clinical presentation <sup>†</sup>                                                                                                                                                                                                                                                                                                                                | 8                           | -                          | 8                             | -                                  |                                 |
| <b>Time interval from symptom onset to first hs-cTnT, n</b>                                                                                                                                                                                                                                                                                                               |                             |                            |                               | <b>&gt; 52<br/>ng/L<br/>(n=34)</b> | <b>Δ0-1<br/>hour<br/>(n=11)</b> |
| < 2 hours                                                                                                                                                                                                                                                                                                                                                                 | 1                           | -                          | -                             | -                                  | 1                               |
| 2 – 2.99 hours                                                                                                                                                                                                                                                                                                                                                            | 6                           | -                          | 3                             | 2                                  | 1                               |
| 3 – 5.99 hours                                                                                                                                                                                                                                                                                                                                                            | 16                          | -                          | 5                             | 8                                  | 3                               |
| 6 – 11.99 hours                                                                                                                                                                                                                                                                                                                                                           | 25                          | -                          | 5                             | 14                                 | 6                               |
| 12 – 23.99 hours                                                                                                                                                                                                                                                                                                                                                          | 10                          | 1                          | 1                             | 8                                  | -                               |
| > 24 hours                                                                                                                                                                                                                                                                                                                                                                | 3                           | -                          | 1                             | 2                                  | -                               |
| Hs-cTnT manifestation and symptom duration prior first hs-cTnT sampling among patients with AMI. Further subdivided according to the 0/1-hour algorithm.                                                                                                                                                                                                                  |                             |                            |                               |                                    |                                 |
| ECG: electrocardiogram; hs-cTnT: high-sensitivity cardiac troponin T                                                                                                                                                                                                                                                                                                      |                             |                            |                               |                                    |                                 |
| *The one false-negative case also underwent endpoint adjudication, as she was not hospitalised for further tests. She was categorised as a potential AMI even though none of her hs-cTnT values exceeded 14 ng/L (Δ0-4 hour > 50 %, hs-cTnT: 5 – 6 – 13 – 8 ng/L at 0 – 1 – 4 – 12 hours, respectively) due to increased focus on sex-specific thresholds for hs-cTnT.(5) |                             |                            |                               |                                    |                                 |
| † Including relevant change between initial and repeated ECGs                                                                                                                                                                                                                                                                                                             |                             |                            |                               |                                    |                                 |

**Table S3 Distributions of the prehospital hs-cTnT values**

|                                                                                                                                                                                                                                                                                                                                                                                                                                                                                                                                                                                | <b>At least one<br/>hs-cTnT &gt; URL<br/>(n=293)</b> | <b>All<br/>hs-cTnT &lt; URL<br/>(n=1418)</b> | <b>Total<br/>(n=1711)</b> |
|--------------------------------------------------------------------------------------------------------------------------------------------------------------------------------------------------------------------------------------------------------------------------------------------------------------------------------------------------------------------------------------------------------------------------------------------------------------------------------------------------------------------------------------------------------------------------------|------------------------------------------------------|----------------------------------------------|---------------------------|
| <b>According to the 0/1-hour algorithm</b>                                                                                                                                                                                                                                                                                                                                                                                                                                                                                                                                     |                                                      |                                              |                           |
| <b>Rule-out</b>                                                                                                                                                                                                                                                                                                                                                                                                                                                                                                                                                                | <b>2</b>                                             | <b>1309</b>                                  | <b>1311</b>               |
| <b>Observation</b>                                                                                                                                                                                                                                                                                                                                                                                                                                                                                                                                                             | <b>230</b>                                           | <b>104</b>                                   | <b>334</b>                |
| <b>Rule-in</b>                                                                                                                                                                                                                                                                                                                                                                                                                                                                                                                                                                 | <b>62</b>                                            | <b>4</b>                                     | <b>66</b>                 |
| <b>AMI versus non-AMI</b>                                                                                                                                                                                                                                                                                                                                                                                                                                                                                                                                                      |                                                      |                                              |                           |
| <b>Significant rise/fall</b>                                                                                                                                                                                                                                                                                                                                                                                                                                                                                                                                                   | <b>67</b>                                            | <b>3</b>                                     | <b>70</b>                 |
| AMI                                                                                                                                                                                                                                                                                                                                                                                                                                                                                                                                                                            | 58                                                   | 3                                            | 61                        |
| No-AMI                                                                                                                                                                                                                                                                                                                                                                                                                                                                                                                                                                         | 9                                                    | 0                                            | 9                         |
| <b>No rise/fall</b>                                                                                                                                                                                                                                                                                                                                                                                                                                                                                                                                                            | <b>226</b>                                           | <b>1415</b>                                  | <b>1641</b>               |
| <b>Disposition after OAEOC</b>                                                                                                                                                                                                                                                                                                                                                                                                                                                                                                                                                 |                                                      |                                              |                           |
| <b>Primary care</b>                                                                                                                                                                                                                                                                                                                                                                                                                                                                                                                                                            | <b>172</b>                                           | <b>1313</b>                                  | <b>1485</b>               |
| No follow-up                                                                                                                                                                                                                                                                                                                                                                                                                                                                                                                                                                   | 34                                                   | 360                                          | 394                       |
| Contact regular GP                                                                                                                                                                                                                                                                                                                                                                                                                                                                                                                                                             | 104                                                  | 872                                          | 976                       |
| Admitted municipal STF                                                                                                                                                                                                                                                                                                                                                                                                                                                                                                                                                         | 15                                                   | 8                                            | 23                        |
| Referral to hospital outpatient clinic                                                                                                                                                                                                                                                                                                                                                                                                                                                                                                                                         | 18                                                   | 49                                           | 67                        |
| Left during observation                                                                                                                                                                                                                                                                                                                                                                                                                                                                                                                                                        | 1                                                    | 24                                           | 25                        |
| <b>Hospital</b>                                                                                                                                                                                                                                                                                                                                                                                                                                                                                                                                                                | <b>132</b>                                           | <b>94</b>                                    | <b>226</b>                |
| AMI                                                                                                                                                                                                                                                                                                                                                                                                                                                                                                                                                                            | 58                                                   | 2                                            | 60                        |
| No-AMI with significant rise/fall                                                                                                                                                                                                                                                                                                                                                                                                                                                                                                                                              | 9                                                    | 0                                            | 9                         |
| No-AMI without significant rise/fall                                                                                                                                                                                                                                                                                                                                                                                                                                                                                                                                           | 65                                                   | 92                                           | 157                       |
| <b>90-day incidence of AMIs or all-cause death</b>                                                                                                                                                                                                                                                                                                                                                                                                                                                                                                                             | <b>65</b>                                            | <b>5</b>                                     | <b>70</b>                 |
| <p>Distribution of hs-cTnT values sampled (0, 1 or 4 hours) during the prehospital observation, classified by hs-cTnT values below or above the URL (14 ng/L). Further subdivided according to the 0/1-hour algorithm, final adjudication, disposition after ended observation at the OAEOC, and 90-day prognosis for AMI or all-cause death.</p> <p>AMI: acute myocardial infarction; GP: general practitioners; hs-cTnT: high-sensitivity cardiac troponin T; OAEOC: Oslo Accident and Emergency Outpatient Clinic; STF; short-term facility; URL: upper reference limit</p> |                                                      |                                              |                           |

**Table S4 Characteristics of misclassified patients according to the 0/1-hour algorithm**

|                               | Sex | Age   | Symptom onset to hs-cTnT (hours) | Hs-cTnT at OAEOC |     |         | According to the 0/1h algorithm | Disposition after OAEOC                                                              | Final diagnosis (ICD-10)                                       |
|-------------------------------|-----|-------|----------------------------------|------------------|-----|---------|---------------------------------|--------------------------------------------------------------------------------------|----------------------------------------------------------------|
|                               |     |       |                                  | 0h               | 1h  | 4h      |                                 |                                                                                      |                                                                |
| <b>False negative (n=1)</b>   | F   | 70    | 18.0                             | 5                | 6   | 13      | Rule-out                        | Primary care                                                                         | Pain upper abdomen, gastralgia (R10.1)                         |
| <b>False positives (n=21)</b> | M   | 81    | 15.8                             | 47               | 42  | 49      | Rule-in                         | Primary care                                                                         | Chest pain, unspecified (R07.4)                                |
|                               | M   | 59    | 5.3                              | 11               | 4   | 6       | Rule-in                         | Primary care                                                                         | Chest pain, unspecified (R07.4)                                |
|                               | F   | 64    | 5.4                              | 10               | 4   | 4       | Rule-in                         | Primary care                                                                         | Chest pain, unspecified (R07.4)                                |
|                               | F   | 53    | 3.5                              | 11               | 17  | 10      | Rule-in                         | Primary care                                                                         | Chest pain, unspecified (R07.4)                                |
|                               | F   | 42    | 3.5                              | 8                | 13  | 8       | Rule-in                         | Primary care                                                                         | Precordial pain (R07.2)                                        |
|                               | M   | 92    | 7.3                              | 61               | 65  | 61      | Rule-in                         | Primary care                                                                         | Tendency to fall (R29.6)                                       |
|                               | M   | 56    | 15.6                             | 71               | 73  | 75      | Rule-in                         | Primary care                                                                         | Syncope (R55.0)                                                |
|                               | M   | 84    | 8.6                              | 52               | 50  | 45      | Rule-in                         | Primary care                                                                         | Acute upper respiratory infection, unspecified (J06.9)         |
|                               | F   | 83    | 16.0                             | 63               | 62  | 64      | Rule-in                         | Primary care                                                                         | COPD, exacerbation (J44.1), heart failure (I50.9)              |
|                               | M   | 85    | 22.0                             | 26               | 31  | 33      | Rule-in                         | Primary care                                                                         | Urethrotigonitis (N30.0)                                       |
|                               | M   | 42    | 22.8                             | 18               | 5   | 8       | Rule-in                         | Hospital                                                                             | Chest pain, unspecified (R07.4)                                |
|                               | M   | 88    | 14.6                             | 62               | 60  | 53      | Rule-in                         | Hospital                                                                             | Chest pain, unspecified (R07.4)                                |
|                               | M   | 92    | 86.1                             | 71               | 66  | 58      | Rule-in                         | Hospital                                                                             | Chest pain, unspecified (R07.4), paroxysmal AF (I48.0)         |
|                               | M   | 41    | 3.2                              | 39               | 47  | X       | Rule-in                         | Hospital                                                                             | Tachycardia (R00.0)                                            |
|                               | M   | 50    | 4.7                              | 6                | 11  | X       | Rule-in                         | Hospital                                                                             | Tachycardia (R00.0)                                            |
|                               | M   | 73    | 2.9                              | 90               | 90  | X       | Rule-in                         | Hospital                                                                             | Ventricular tachycardia (I47.2)                                |
|                               | M   | 69    | 4.5                              | 170              | 177 | X       | Rule-in                         | Hospital                                                                             | Atherosclerotic heart disease (I25.1)                          |
|                               | M   | 93    | 2.9                              | 60               | 60  | X       | Rule-in                         | Hospital                                                                             | Atherosclerotic heart disease (I25.1), angina pectoris (I20.9) |
|                               | M   | 64    | 2.7                              | 14               | 21  | 41      | Rule-in                         | Hospital                                                                             | Acute myocarditis, unspecified (I40.9)                         |
| F                             | 86  | 5.9   | 38                               | 33               | X   | Rule-in | Hospital                        | Heart failure (I50.9), chest pain, unspecified (R07.4), essential hypertension (I10) |                                                                |
| F                             | 87  | 103.9 | 161                              | 165              | 161 | Rule-in | Hospital                        | PE (I26.9), heart failure (I50.9), chronic AF (I48.2)                                |                                                                |

AF: atrial fibrillation; COPD: chronic obstructive pulmonary disease; hs-cTnT: high-sensitivity cardiac troponin T; ICD-10: international classification of diseases 10<sup>th</sup> revision; OAEOC: Oslo Accident and Emergency Outpatient Clinic; PE: pulmonary embolism; X: not sampled due to early hospitalisation

## References

1. Bruyninckx R, Aertgeerts B, Bruyninckx P, Buntinx F. Signs and symptoms in diagnosing acute myocardial infarction and acute coronary syndrome: a diagnostic meta-analysis. *Br J Gen Pract.* 2008;58(547):105-11.
2. Verdon F, Herzig L, Burnand B, Bischoff T, Pecoud A, Junod M, et al. Chest pain in daily practice: occurrence, causes and management. *Swiss Med Wkly.* 2008;138(23-24):340-7.
3. Bösner S, Becker A, Haasenritter J, Abu Hani M, Keller H, Sonnichsen AC, et al. Chest pain in primary care: epidemiology and pre-work-up probabilities. *Eur J Gen Pract.* 2009;15(3):141-6.
4. Bossuyt PM, Reitsma JB, Bruns DE, Gatsonis CA, Glasziou PP, Irwig L, et al. STARD 2015: an updated list of essential items for reporting diagnostic accuracy studies. *BMJ.* 2015;351:h5527.
5. Mueller T, Egger M, Peer E, Jani E, Dieplinger B. Evaluation of sex-specific cut-off values of high-sensitivity cardiac troponin I and T assays in an emergency department setting - Results from the Linz Troponin (LITROP) study. *Clin Chim Acta.* 2018;487:66-74.
